# Supplementary material for: Effects of ethyl palmitate on the release of aroma compounds in propanediol–ethanol solution and its mechanisms
Source: PubMed Central journal article supplement (PMC11194716; doi:10.3389/fchem.2024.1381835), 2024-06-10
Supplement: Image1.pdf [file Image1.pdf]

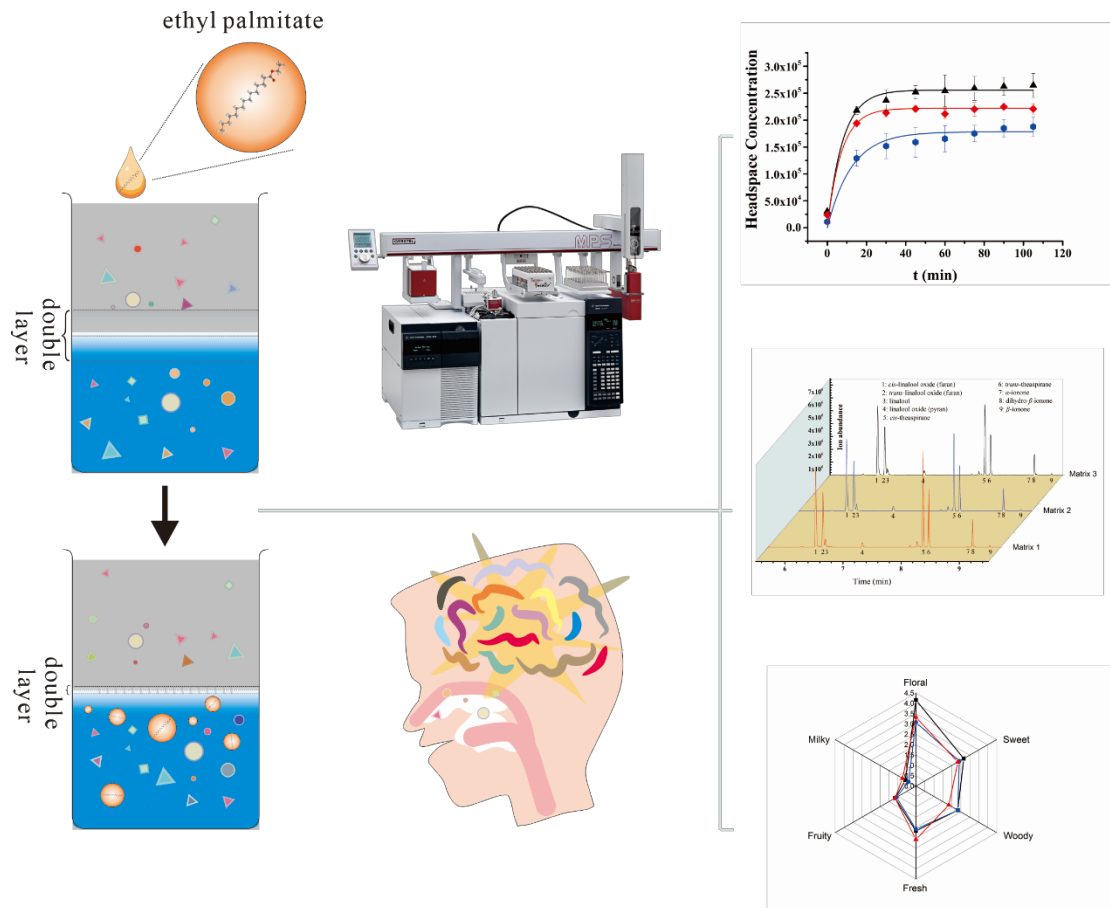

EP affects the release behavior of aroma compounds by self-assemble effect and dipole-dipole interaction.
